# Supplementary material
Source: PubMed Central journal article supplement (PMC3905741)
Supplement: NIHMS547200-supplement-1.pdf [file NIHMS547200-supplement-1.pdf]

**Fig. S1**

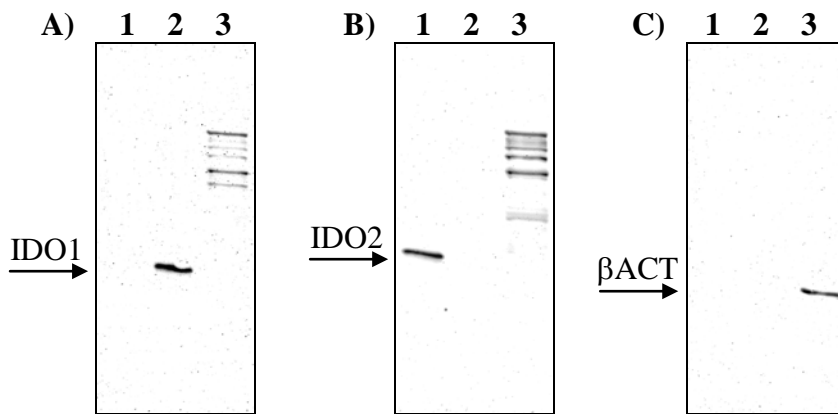

*Figure S1. Assessment of the specificity of IDO1 and IDO2 antibodies.* Western blotting of purified IDO2 protein (lane 1), purified IDO1 protein (lane 2) and lysate of human CD34<sup>+</sup> cells, immunomagnetically purified (Milteny Biotec; lane 3). IDO1 and IDO2 antibodies are specific for IDO1 and IDO2 purified protein, respectively (A and B). Human CD34<sup>+</sup> cells represent the negative control for IDO1 and IDO2 expression. Representative results of 3 independent experiments.

**Fig. S2**

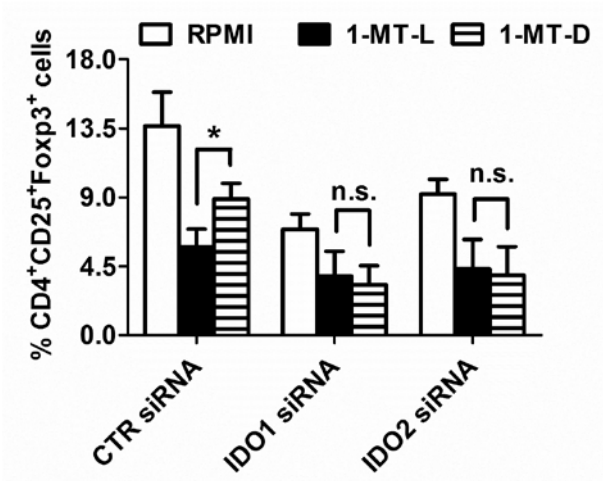

*Figure S2. Assessment of the selectivity of 1-MT-L and 1-MT-D.* Quantification of T cells coexpressing CD4, CD25 and Foxp3 after the coculture of autologous CD3<sup>+</sup> T cells with DC treated with CTR-siRNA or IDO1- or IDO2-specific siRNA, in the presence or absence of 1-MT-L and 1-MT-D (1 mM). Representative results of 5 independent experiments.
